# Supplementary material
Source: PubMed Central journal article supplement (PMC3158224)
Supplement: 1102457108_pnas.201102457SI.pdf [file 1102457108_pnas.201102457SI.pdf]

# Supporting Information

Orellana et al. 10.1073/pnas.1102457108

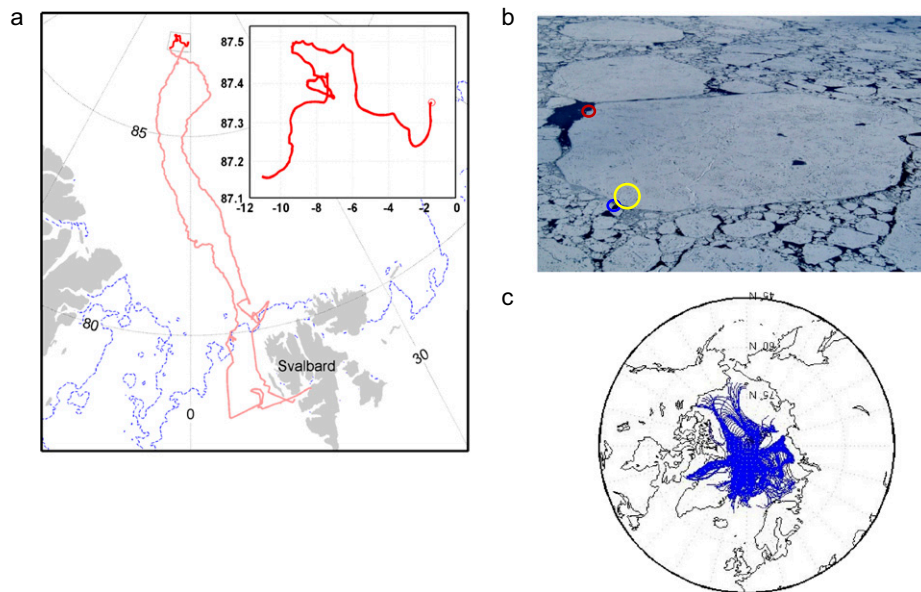

**Fig. S1.** Study area. (A) Map of the cruise track (pink) during the ASCOS expedition (08-2008, at 87–88° N, 2–10° W), with ice-drift period highlighted (red, and inset area indicated) and (inset) shown in detail with the start of the drift marked by the circle. The ice edge (blue line) is shown for the start of the drift period on 12 August 2008. The drift area was within air with a minimal influence by man-made sources. (B) Aerial photograph of the ice floe used for the 3-wk drift taken from a helicopter where the blue circle indicates the location of the Icebreaker Oden, the yellow circle is the location of the meteorological sampling camp, and the red circle shows the location of lead sampled. (C) Air mass trajectories with an arrival height of 100 m at the position of the icebreaker.

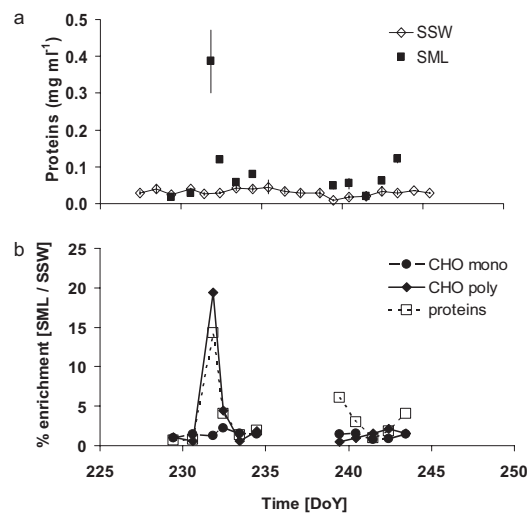

**Fig. S2.** Partial characterization of DOM in SML and SSW waters. (A) Protein concentration (fraction >0.7 μm) in SSW and SML waters. (B) Dissolved poly- and monosaccharide as well as particulate protein enrichment; proteins and polysaccharides were enriched in the SML immediately after cold periods.



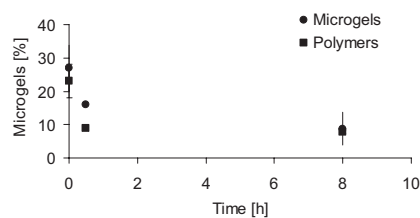

Fig. S5. Cleavage of microgels irradiated with environmental levels of UV at 87°N. Environmental levels of UV irradiation on spontaneously assembled microgels from the SSW DOM resulted in a factor of three reduction of the microgel yield indicating dispersion of microgels and cleavage of biopolymers.

**Table S1. Cross reactivity of antibody to DOM from selected phytoplankton species kept in culture and field samples**

| No.*  | Class                          | Genus                  | Species              | Reactivity |
|-------|--------------------------------|------------------------|----------------------|------------|
| 327   | Cryptophyceae                  | <i>Guillardia</i>      | <i>theta</i>         | —          |
| 334   | Coscinodiscophyceae            | <i>Cyclotella</i>      | <i>meneghiniana</i>  | —          |
| 336   | Coscinodiscophyceae            | <i>Cyclotella</i>      | <i>meneghiniana</i>  | —          |
| 338   | Coscinodiscophyceae            | <i>Cyclotella</i>      | <i>meneghiniana</i>  | —          |
| 419   | Dinophyceae                    | <i>Protodinium</i>     | sp.                  | —          |
| 425   | Dinophyceae                    | <i>Gymnodinium</i>     | sp.                  | —          |
| 440   | Cryptophyceae                  | <i>Hemiselmis</i>      | <i>rufescens</i>     | —          |
| 452   | Raphidophyceae                 | <i>Heterosigma</i>     | <i>akashivo</i>      | —          |
| 525   | Eustigmatophyceae              | <i>Nannochloropsis</i> | <i>oculata</i>       | —          |
| 689   | Dinophyceae                    | <i>Prorocentrum</i>    | <i>micans</i>        | —          |
| 702   | Dinophyceae                    | <i>Prorocentrum</i>    | sp.                  | —          |
| 703   | Dinophyceae                    | <i>Prorocentrum</i>    | sp.                  | —          |
| 1178  | Cryptophyceae                  | <i>Rhodomonas</i>      | <i>abbreviata_cf</i> | —          |
| 1322  | Dinophyceae                    | <i>Heterocapsa</i>     | <i>pygmaea</i>       | —          |
| 1577  | Coscinodiscophyceae            | <i>Cyclotella</i>      | <i>striata_cf</i>    | —          |
| 1594  | Euglenophyceae                 | <i>Eutreptiella</i>    | <i>gymnastica_cf</i> | —          |
| 1595  | Raphidophyceae                 | <i>Heterosigma</i>     | <i>akashivo</i>      | —          |
| 1647  | Coscinodiscophyceae            | <i>Thalassiosira</i>   | <i>rotula</i>        | —          |
| 2283  | Prymnesiophyceae               | <i>Emiliana</i>        | <i>huxleyi</i>       | —          |
| 2715  | Cryptophyceae                  | <i>Proteomonas</i>     | sp.                  | —          |
| 2948  | Dinophyceae                    | <i>Symbiodinium</i>    | sp.                  | —          |
| 3162  | Bacillariophyceae              | <i>Surirella</i>       | sp.                  | —          |
| 3171  | Prasinophyceae                 | unid                   | sp.                  | —          |
| 3194  | Rhodophyceae                   | <i>Bostrychia</i>      | <i>calliptera</i>    | —          |
| 1013  | Coscinodiscophyceae            | <i>Thalassiosira</i>   | <i>pseudonana</i>    | —          |
| ASCOS | Coscinodiscophyceae            | <i>Melosira</i>        | <i>artica</i>        | +          |
|       | Phytoplankton from Puget Sound |                        |                      | —          |

The antibody was generated against seawater DOM collected during ASCOS (08-2008, 87° N, 2–10° W). A negative sign indicates no immuno reactivity, whereas a positive sign indicates reactivity.

\*Culture Center for Marine Phytoplankton, Bigelow Laboratory for Ocean Sciences
